# Supplementary material for: Development of an Objective Low Flow Identification Method Using Breakpoint Analysis
Source: MDPI journal article supplement (doi:10.3390/w14142212), 2022-07-13
Supplement: s1 [file s1]

Archive with 1 entries (1 files):
- water-1760134-supplementary.pdf
